# Supplementary material for: Pitfalls of invasive blood pressure monitoring using the caudal ventral artery in rats
Source: PubMed Central journal article supplement (PMC5304151; doi:10.1038/srep41907), 2017-02-13
Supplement: srep41907-s1.pdf [file srep41907-s1.pdf]

1 **Pitfalls of invasive blood pressure monitoring using the caudal**  
2 **ventral artery in rats**

3  
4 Hiroki Ohta<sup>1,2</sup>, Takao Ohki<sup>2</sup>, Yuji Kanaoka<sup>2</sup>, Makoto Koizumi<sup>3</sup>, and Hiroataka J Okano<sup>1</sup>  
5  
6

7 **Supplemental Figure 1**

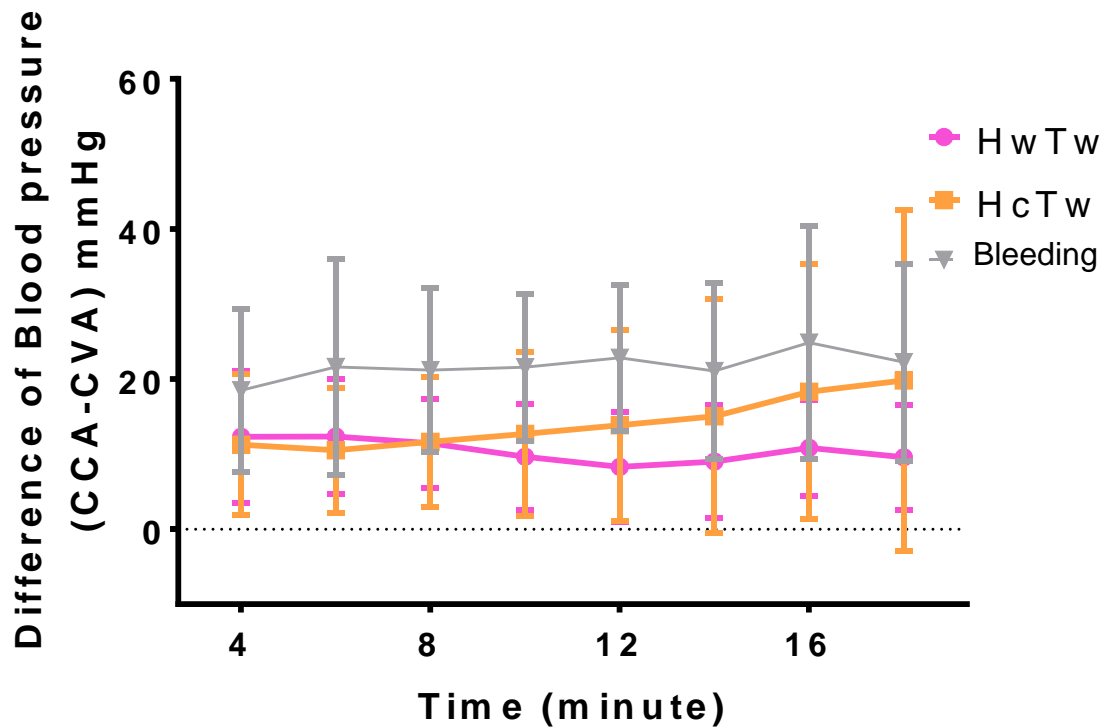

27 **Supplemental Figure 1. No significant difference between HwTw, HcTw and**  
28 **bleeding groups**

29 The graph shows the change over time under each condition. A significant blood  
30 pressure disparity was not observed in the head cooling group (HcTw) nor the bleeding  
31 group (Bleeding) compared to the control group (HwTw) based on two-way ANOVA.  
32
